# Supplementary material for: Large gap two-dimensional topological insulators with the coexistence of a significant Rashba effect and piezoelectricity in functionalized PbGe monolayers
Source: Royal Society of Chemistry journal article supplement (doi:10.1039/d2nr05912f), 2023-01-01
Supplement: d2nr05912f1.pdf [file d2nr05912f1.pdf]

# Large Gap Two-Dimensional Topological Insulators with the coexistence of the Significant Rashba Effect and the Piezoelectricity in Functionalized PbGe Monolayers

Ningyuan Shen, Shuangying Lei\*, Yonghu Wang, Neng Wan, Jie Chen, Qinan Huang

<sup>a</sup> Key Laboratory of Microelectromechanical Systems of the Ministry of Education,  
Southeast University, Nanjing 210096, China.

\*Corresponding author. E-mail address: lsy@seu.edu.cn (S. Lei)

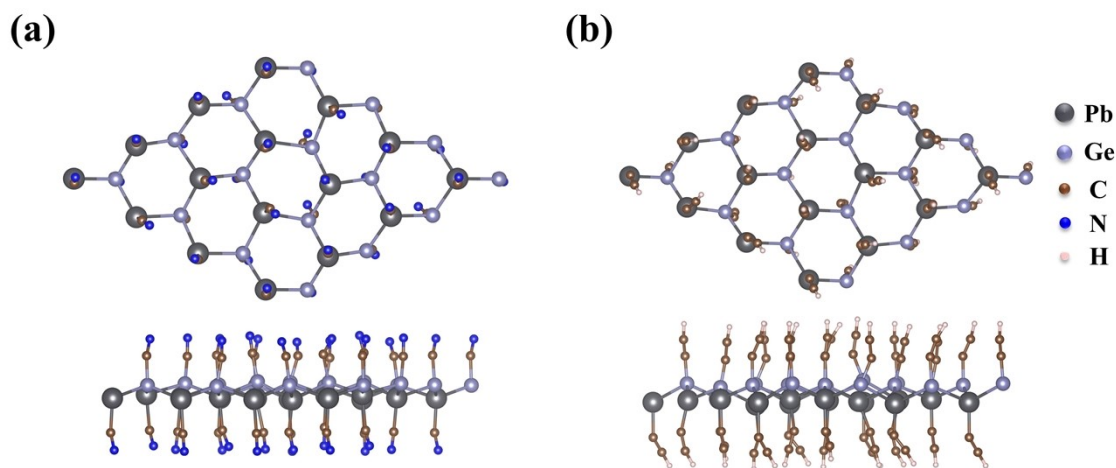

**Figure S1.** Top and side view of the structures of (a)  $\text{PbGe}(\text{CN})_2$  and (b)  $\text{PbGe}(\text{C}_2\text{H})_2$  after 4ps of the MD simulation at 300 K with NVT ensemble.

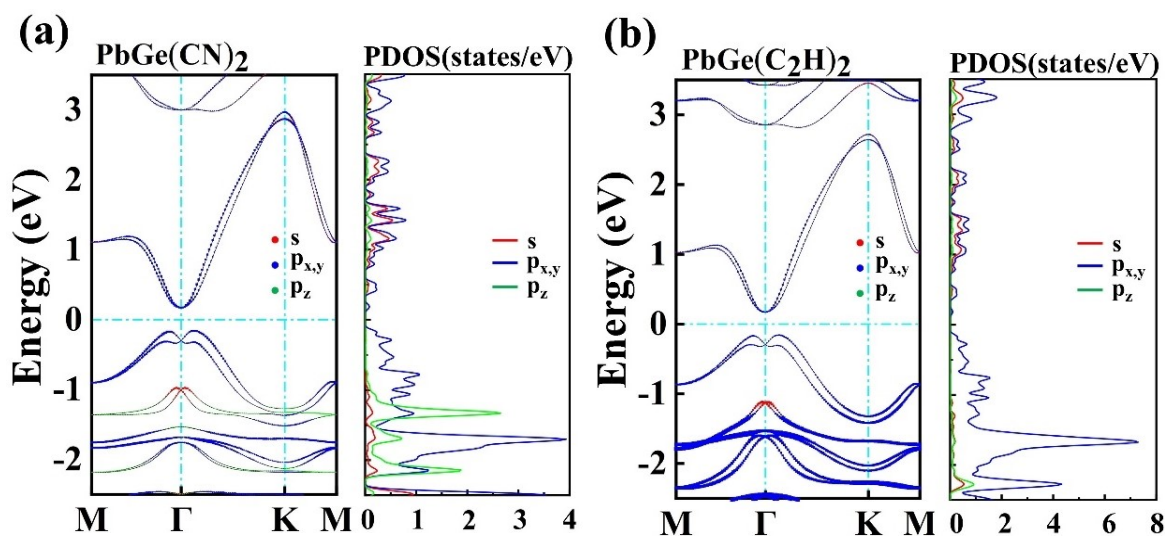

**Figure S2.** The projected density of states (PDOS) for  $\text{PbGe}(\text{CN})_2$  and  $\text{PbGe}(\text{C}_2\text{H})_2$ .

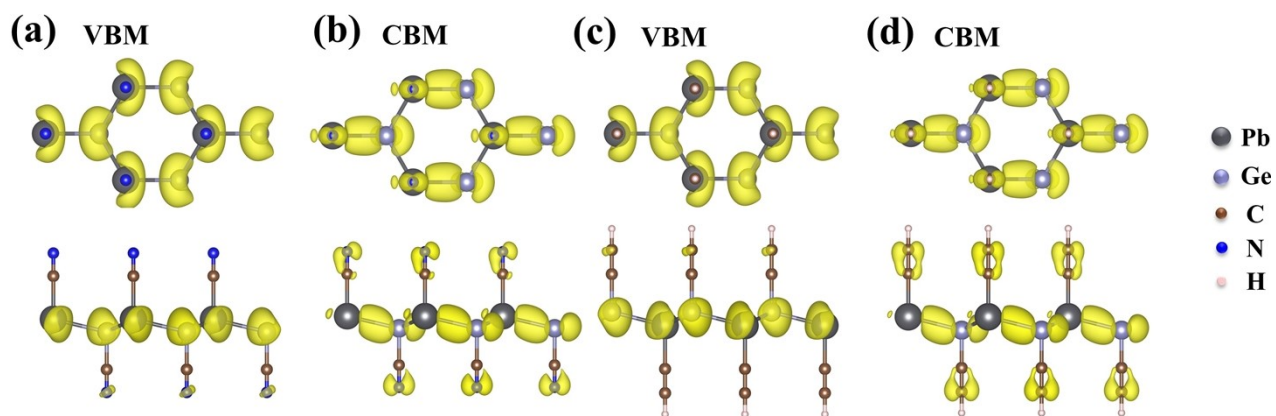

**Figure S3.** The partial charge density (PCD) of VBM and CBM for  $\text{PbGe}(\text{CN})_2$  and  $\text{PbGe}(\text{C}_2\text{H})_2$ .

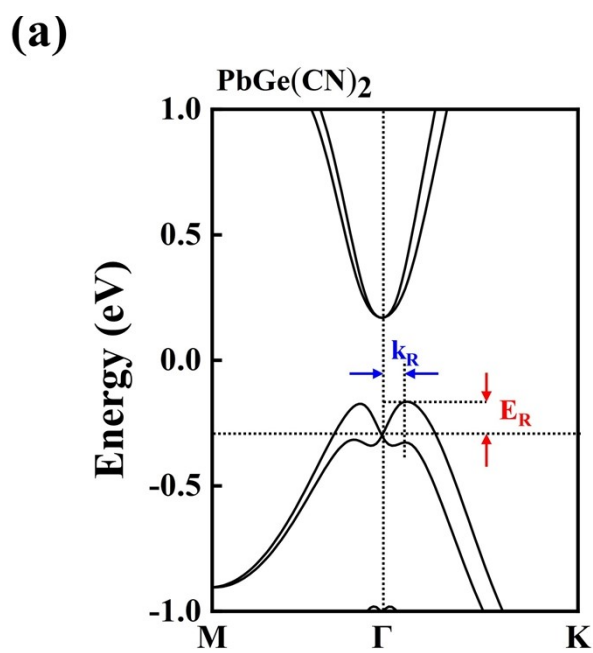

**Figure S4.** The schematic diagram of Rashba splitting energy  $E_R$  and momentum offset  $k_R$ .

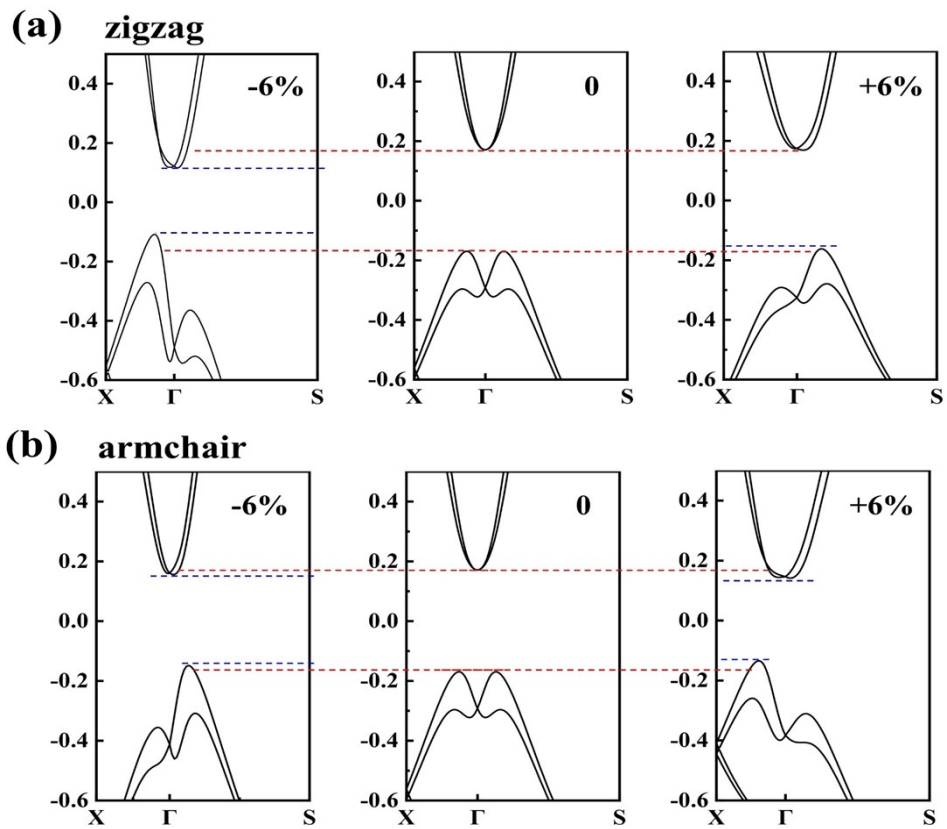

**Figure S5.** The variation trend of the VBM and CBM under uniaxial strain along the (a)zigzag direction and (b) armchair direction for  $\text{PbGe}(\text{C}_2\text{H})_2$ .

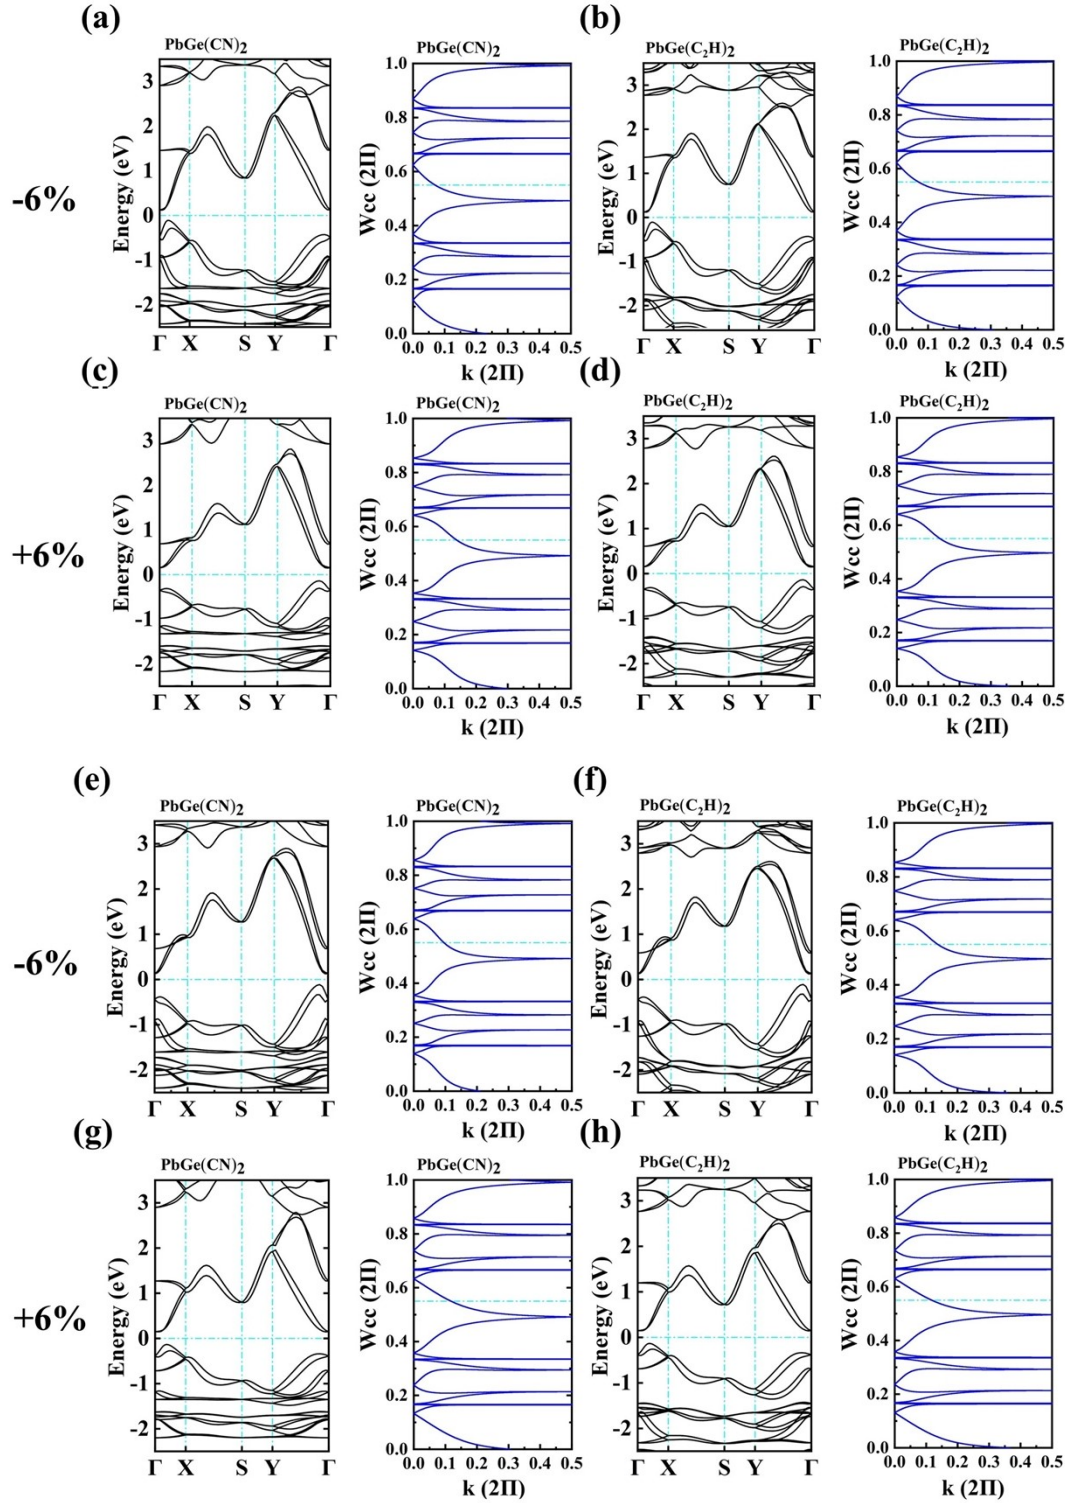

**Figure S6.** The band structures and WCCs evolutions at the uniaxial strain of -4% and 6% along the (a-d) zigzag direction and (e-h) armchair direction.
